# Supplementary material
Source: publisher figshare collection journal article supplement (https://frontiersin.figshare.com/ndownloader/files/14557007)
Supplement: Supplementary file 1 [file 14557007]

	Sphingomonas (Sphingomonadaceae)	Massilia (Oxalobacteraceae)	Frondihabitans (Microbacteriaceae)	Pseudomonas (Pseudomonadaceae)	Hymenobacter (Cytophagaceae)	Rathayibacter (Microbacteriaceae)	Clavibacter (Microbacteriaceae)	Rhodococcus (Nocardiaceae)	Rhizobium (Rhizobiaceae)	Rhodococcus (Nocardiaceae)	Aurantimonas (Aurantimonadaceae)	Sphingomonas (Sphingomonadaceae)	Unknown (Microbacteriaceae)	Pedobacter (Sphingobacteriaceae)	Arthrobacter (Micrococcaceae)	Actinomycetospora (Pseudonocardiaceae)	Sporosarcina (Planococcaceae)	Sporosarcina (Planococcaceae)	Planococcus (Planococcaceae)	Unknown (Sphingomonadaceae)	Bradyrhizobium (Bradyrhizobiaceae)	Conexibacter (Conexibacteraceae)	Bacillus (Bacillaceae_1)	Unknown (Cystobacteraceae)	Unknown (Enterobacteriaceae)	Staphylococcus (Staphylococcaceae)	Acidisoma (Acetobacteraceae)	Unknown (GpI)	Blastococcus (Geodermatophilaceae)	Terrabacter (Intrasporangiaceae)	Actinoallomurus (Thermomonosporaceae)	Bacillus (Bacillaceae_1)	Lysinibacillus (Planococcaceae)	Ktedonobacter (Ktedonobacteraceae)	Hymenobacter (Cytophagaceae)	Hymenobacter (Cytophagaceae)	Methylobacterium (Methylobacteriaceae)	Lysobacter (Xanthomonadaceae)	Unknown (Beijerinckiaceae)	Actinoplanes (Micromonosporaceae)	Unknown (Anaerolineaceae)	Zymobacter (Halomonadaceae)	Hymenobacter (Cytophagaceae)	Unknown (Chitinophagaceae)	Amycolatopsis (Pseudonocardiaceae)	Pseudoxanthomonas (Xanthomonadaceae)	Micromonospora (Micromonosporaceae)	Unknown (GpI)	Nocardioides (Nocardioidaceae)
ABF-8-18	8.5953713189902	2.35374471326871	1.6759923293141	1.00612078703339	1.14534898993879	1.16899151496046	0.554285864396984	0.759187747918144	0.861638689678724	0.554285864396984	0.685633225628497	0.790711114613707	0.436073239288623	0.493866078230488	0.861638689678724	0.604197861664959	0.661990700606825	1.72327737935745	0.60945175611422	0.591063125541808	0.696141014527018	0.517508603252161	0.520135550476791	0.60945175611422	0.464969658759556	NA	NA	NA	NA	NA	NA	NA	NA	NA	NA	NA	NA	NA	NA	NA	NA	NA	NA	NA	NA	NA	NA	NA	NA
BIM-8-18	5.92659961480847	1.47442756259362	1.25401241172694	0.821741921677723	0.577787288679649	1.11919537770169	0.713674299165418	NA	NA	NA	NA	NA	NA	NA	1.14166488337257	NA	0.683714958270918	1.79542050074898	0.606676653113632	0.634496041087096	0.660175476139525	0.427990584207147	0.656965546757971	0.624866252942435	NA	0.438690348812326	0.491119195377702	0.770383051572865	0.573507382837578	0.56708752407447	0.402311149154719	0.395891290391611	0.399101219773165	0.393751337470576	NA	NA	NA	NA	NA	NA	NA	NA	NA	NA	NA	NA	NA	NA	NA
BRA-8-18	3.64234894340023	0.744853532365479	1.17416829745597	1.37441405361125	1.15293011119708	0.638662601071011	0.485444257346137	NA	NA	NA	NA	0.485444257346137	NA	NA	0.553709856035437	0.49302932386717	NA	0.544607776210197	NA	NA	NA	NA	NA	NA	NA	0.564328949164884	NA	NA	NA	NA	NA	NA	NA	NA	0.723615346106585	0.50213140369241	1.0679773661615	0.546124789514404	0.744853532365479	0.496063350475584	0.587084148727984	1.97818534868551	0.49758036377979	0.524886603255511	0.496063350475584	2.07224017354632	0.764574705320166	NA	NA
GRA-8-18	6.50759219088937	1.55409621727632	1.12471399280896	0.840935429233649	0.870650462068761	0.953852554007072	0.745847324161293	NA	0.57944314028467	0.466526015511247	NA	NA	0.463554512227736	NA	0.989510593409206	NA	0.629958696104359	1.53180994264999	0.522984577897959	0.514070068047425	0.420467714616825	0.558642617300092	0.73693281431076	0.427896472825602	NA	NA	NA	NA	0.52595608118147	0.457611505660714	0.484355035212314	NA	NA	NA	NA	NA	NA	NA	NA	NA	NA	NA	NA	NA	NA	NA	NA	0.476926277003536	0.438296734317891
JAS-8-18	6.4426765812807	1.86810282766979	1.22019009085359	1.25026199003071	1.97836645798591	1.28397896789597	0.814675086798436	0.656114163864512	0.658847972880615	NA	NA	NA	NA	NA	0.764555254836564	NA	0.751797479428087	1.85716759160538	0.566809736005176	NA	0.674339557305193	NA	1.26848738347139	NA	0.45290102700092	NA	NA	NA	NA	NA	NA	NA	0.483884195850078	0.432853094216171	NA	0.629687343375525	0.552229421252631	NA	NA	NA	NA	NA	NA	NA	NA	NA	NA	NA	NA
LAU-8-18	6.79219064823178	1.3812269853401	1.74251372194817	1.12971583408601	5.20808726464253	1.62995900785104	0.837907316056416	0.576669214201348	NA	NA	NA	0.51274925310915	NA	NA	0.610018759119016	NA	0.901827277148614	2.36503856041131	0.819842979226013	0.526644896824845	NA	NA	1.09080803168207	NA	NA	NA	NA	NA	NA	NA	NA	0.461335371361078	0.508580559994442	NA	NA	0.722573473216147	NA	NA	0.557215312999375	NA	NA	NA	NA	NA	NA	NA	NA	NA	NA
MEL-8-18	7.91133844842285	1.84143222506394	1.27365728900256	1.19181585677749	0.76385336743393	0.898550724637681	0.690537084398977	NA	NA	NA	NA	0.492753623188406	0.395566922421142	NA	0.816709292412617	NA	NA	0.859335038363171	NA	0.421142369991475	0.555839727195226	0.443307757885763	NA	0.485933503836317	NA	NA	NA	NA	NA	NA	NA	NA	NA	NA	NA	NA	NA	NA	0.73998294970162	NA	NA	NA	NA	NA	NA	NA	NA	NA	NA
MIC-8-18	6.38859300861819	0.551951195894258	1.03127723443401	0.452696814176431	0.777089183693231	1.0107001065169	0.453907233465673	0.478115619250508	0.358284109615571	NA	NA	NA	NA	NA	1.07848358671444	NA	1.21526096639876	3.32865304541493	0.884816500435751	0.745618282172945	0.889658177592718	0.415173816209935	1.29877989735644	0.60763048319938	NA	NA	NA	NA	0.470853103515058	0.504744843613828	0.462380168490365	0.902972789774378	0.642732642587392	NA	NA	NA	NA	NA	NA	NA	NA	NA	NA	NA	NA	NA	NA	NA	NA
ORG-8-18	4.70155478949537	1.03016110714681	0.661313179026925	NA	NA	NA	NA	NA	NA	NA	NA	NA	NA	NA	0.505532718921798	NA	0.633172192685354	1.28946019557986	NA	NA	NA	NA	NA	NA	NA	0.495482366656951	NA	NA	NA	NA	NA	NA	NA	1.0110654378436	NA	NA	NA	NA	NA	NA	0.745736138051639	NA	NA	NA	NA	NA	NA	NA	NA
SAF-8-18	3.91148645037148	0.848789352717943	0.615746432198407	0.661713613768774	NA	0.600780373082474	NA	NA	NA	NA	NA	NA	NA	NA	0.668127639104174	NA	0.649954567320541	1.73713186167085	0.527019081725373	NA	0.567641242182907	NA	NA	0.57940028863114	NA	NA	2.30263509540863	1.78844406435405	NA	NA	NA	NA	NA	NA	NA	NA	NA	NA	NA	NA	NA	NA	NA	NA	NA	NA	NA	NA	NA
SKI-8-18	3.28258757114432	0.659849150895377	0.765350978668271	2.56073296006663	0.400721854611078	0.562676414788765	0.298921845356531	NA	0.377585488871408	NA	NA	0.306325482393226	NA	NA	0.670954606450419	0.346120031465457	0.267456387950581	0.670029151820832	NA	0.331312757392069	0.527509138864467	NA	NA	0.454398223127111	NA	NA	NA	NA	NA	0.298921845356531	NA	NA	NA	NA	NA	NA	0.413678219425293	NA	NA	NA	NA	NA	NA	NA	NA	NA	NA	NA	NA
TAF-8-18	6.09138827800468	1.40212471346622	1.24154943507755	0.756332832990075	NA	0.975087560070281	0.439836632108074	NA	NA	NA	NA	NA	NA	NA	0.862219429608685	NA	0.86920096345167	1.74305628279866	0.607393444339721	NA	NA	NA	0.830802527315251	0.46078123363703	NA	NA	NA	NA	0.474744301323001	NA	NA	0.622520100999523	NA	NA	NA	NA	NA	NA	NA	NA	NA	NA	NA	NA	NA	NA	NA	NA	NA
TRA-8-18	4.67682503689658	0.69785853215134	0.959799829933635	0.596209670325374	0.43103026985818	0.937319793183662	0.435917234369044	0.545385239412391	0.467193807238572	0.626508850292729	NA	NA	NA	NA	1.23249244963983	NA	1.75246547359573	5.10687791385259	1.48954678291126	0.724248140510004	0.5199730239559	NA	1.55014514284597	0.562000918749328	NA	0.637260172216629	NA	NA	0.385092803456061	0.463284235629881	NA	1.11618269428127	0.85130921779246	1.27256555862891	NA	NA	NA	NA	NA	NA	NA	NA	NA	NA	NA	NA	NA	NA	NA
WEF-8-18	7.33254429115656	2.12486592447387	1.47205681103673	1.17616599474794	1.23904279320931	1.08924806746311	0.734179087916559	0.464178718053038	0.663905019047971	0.503014387690942	NA	0.695343418278655	NA	NA	1.32041276768872	NA	NA	0.908014942486223	NA	0.584384362170359	0.55849391574509	0.490069164478308	0.671302289455191	0.593630950179384	NA	1.07630284425047	NA	NA	NA	0.497466434885527	NA	NA	NA	NA	0.495617117283722	NA	NA	NA	NA	NA	NA	NA	NA	NA	NA	NA	NA	NA	NA
WES-8-18	6.29426827939414	1.37980821619266	0.979350550288765	0.47673531655225	0.873106679742835	0.736896589299335	0.535305655442955	0.47945951836112	0.706930369401765	0.448131197559115	NA	0.7082924703062	NA	NA	0.96981584395772	NA	0.56390977443609	1.57867494824017	0.543478260869565	NA	0.42225128037485	NA	0.608859104282445	0.505339435545385	NA	0.456303802985725	NA	NA	NA	0.40590606952163	NA	0.64836003051106	NA	NA	NA	NA	NA	NA	NA	NA	NA	NA	NA	NA	NA	NA	NA	NA	NA
[truncated: 67 more columns]
